# Supplementary material
Source: MDPI journal article supplement (https://www.mdpi.com/2227-7390/10/13/2169)
Supplement: s1 [file s1]

Archive with 1 entries (1 files):
- mathematics-1726428-supplementary revised.pdf
